# Supplementary material for: Characterization of miRNAs in Response to Short-Term Waterlogging in Three Inbred Lines of Zea mays
Source: PLoS One. 2012 Jun 29;7(6):e39786. doi: 10.1371/journal.pone.0039786 (PMC3387268; doi:10.1371/journal.pone.0039786)
Supplement: Table S8 — miRNA targets qRT-PCR primers. The first column is the miRNA id. The second column is the target gene id. The third column is the gene specific forward primer for the qRT-PCR. The fourth column is the gene specific reverse primer for the qRT-PCR. The fifth column is the designed product size (around 200 bp). The last column is the targets annotation. (XLSX) [file pone.0039786.s013.xlsx]

## Sheet: Sheet1
Table S8. qRT-PCR primers of miRNA targets.
miRNA_ID	Target_ID	Left_primer	Right_primer	Size	Description
zma-miR156a/b/c/d/e/f/g/h/i/l&k	GRMZM5G878561	GGGAGTTCGATGAGGTGAAG	CACCGACCATTTAGGCTGTT	185	SBP-box transcription factor;Fungal lignin peroxidase
zma-miR156a/b/c/d/e/f/g/h/i/l&k	GRMZM2G061734	CCAAGCGCAGTTGTAGAAAGA	ATGAGCTGTCCTCGGATTTG	198	SBP-box transcription factor;Antifreeze protein, type I
zma-miR156a/b/c/d/e/f/g/h/i/l&k	GRMZM2G065451	CCGAGTTCGACCAGAAGAAG	GGACCTTCACCAAACAGGAG	163	SBP-box transcription factor
zma-miR156a/b/c/d/e/f/g/h/i/l&k	GRMZM2G097275	ACGGAAACCACAACCTGAAG	CCAGGGTTATCCCATGAAGA	150	SBP-box transcription factor
zma-miR156a/b/c/d/e/f/g/h/i/l&k	GRMZM2G414805	AACAGCATCCCCTGATGAAC	AGCCGTCTGACAGAAGAGAGA	215	SBP-box transcription factor
zma-miR159a/b/f/j/k	AC204352.3_FG012	GACGCCTCCAGACTACTCCA	CGTACGGGGAAGAGAAGGAC	221	Cell division
zma-miR159a/b/f/j/k	GRMZM2G093789	CGCTGAGGAAGAGGAAAAGA	GGATAGAGAGGCGAACCACA	159	MYB domain transcription factor;SANT, DNA-binding;Homeodomain-like;Riboflavin kinase
zma-miR159a/b/f/j/k&c/d	AC209015.3_FG004	CGAGAGTCACATGGCAAGAA	TGCCAGTAGATGCATGGTGT	160	unknown
zma-miR159c/d	GRMZM2G046443	ATTCGATCCAAAGGCCTCCT	AAGTTCTTGACGTCGTTGTCC	206	MYB domain transcription factor;Homeodomain-like;SANT, DNA-binding
zma-miR159a/b/f/j/k&c/d	GRMZM2G075064	CAAGAGATGTTGTCGCTGGA	TAGATGGAGAGGCGAACCAC	220	MYB domain transcription factor;Homeodomain-like;SANT, DNA-binding
zma-miR159a/b/f/j/k&c/d	GRMZM2G113073	TGGCATTGATGTCCACTGTT	TCAGATTCACAGCCCAGTCA	185	PAK-box/P21-Rho-binding;Antifreeze protein, type I;Rho GTPase activation protein;RhoGAP
zma-miR159a/b/f/j/k&c/d	AC217264.3_FG005	GAACGCAGTGCAGAGGATG	CTTGGTCCTCGTGTTCCAGT	229	MYB domain transcription factor;Homeodomain-like;SANT, DNA-binding
zma-miR159a/b/f/j/k&c/d	GRMZM2G070523	GCGAGCCTCGAGAAGATG	CAGCAGGCCGAACAGAGTAT	180	MYB domain transcription factor;Small proline-rich;SANT, DNA-binding;Homeodomain-like
zma-miR159a/b/f/j/k&c/d	GRMZM2G085550	ACAGGGTACACGCTGTCGTT	ATAGTTCGTGGTGGCTCTGC	230	unknown
zma-miR159a/b/f/j/k&c/d	GRMZM2G386944	AATCCTCTCCCATGGTGCTT	GTCGATTGATTGATGCGAGA	153	unknown
zma-miR159a/b/f/j/k&g	GRMZM2G038195	GAATTTCACCCAGAGGAGCA	CCCCGATTTCAAGAATAGCA	210	Metallophosphoesterase;Serine/threonine-specific protein phosphatase and bis(5-nucleosyl)-tetraphosphatase
zma-miR159a/b/f/j/k&c/d&h/l	GRMZM2G416652	CGACAATGAGGAGATCGACA	GCGGTTGCTTAACCTGAGAA	194	MYB domain transcription factor;Homeodomain-like;SANT, DNA-binding
zma-miR159a/b/f/j/k&c/d&h/l	GRMZM2G167088	AAACCATTTCATCGCAAACC	TGAAGAAACTTGCCCCTAGC	246	MYB domain transcription factor;Homeodomain-like;SANT, DNA-binding
zma-miR159a/b/f/j/k&h/l	GRMZM2G423833	CGCTGAGGAAGAGGAAAAGA	TCTTGCCATGTGATTCTCCA	230	MYB domain transcription factor;Homeodomain-like;SANT, DNA-binding
zma-miR164e	GRMZM2G003342	TTGTTCTACAGGCGCAAATG	GGAGAAGCAGGACTCGACAG	237	Uncharacterised protein family UPF0066;Antifreeze protein, type I
zma-miR164e	GRMZM2G003769	ACGTTCCAGTACGTGTCCAA	CACGTGAAGTGGTCGAAGAA	248	Peroxisomal biogenesis factor 11
zma-miR164e	GRMZM2G063322	CCAGGACAAGTATCCCCACA	AGACGAGATCAGGGCAAGG	223	Sm-like protein LSm2;Like-Sm ribonucleoprotein-related, core;Like-Sm ribonucleoprotein, core;Like-Sm ribonucleoprotein, eukaryotic and archaea-type, core
zma-miR164e	GRMZM2G163975	TGGCCTGCTTCTTCTTCTTC	GAAGAAGGATGGTGGTGGTG	197	Helix-loop-helix DNA-binding;Basic helix-loop-helix dimerisation region bHLH
zma-miR164e	GRMZM2G397675	GCACGAGTCCTCCTTCTCCT	ATACGAAGTCCTCCGAGTGG	188	Galanin 2 receptor;Protein of unknown function DUF617, plant
zma-miR164a/b/c/d/g	GRMZM2G008819	AACTTCAAAGTCGGGGACAA	TGATGCTGCACACGAAGTAG	181	Cupredoxin;Plastocyanin-like
zma-miR164a/b/c/d/g&e	GRMZM2G009892	GGAGCTCATCACGCACTACC	CTGAAGACGTCCCTGTCCTT	243	No apical meristem (NAM) protein;Antifreeze protein, type I
zma-miR164a/b/c/d/g	GRMZM2G096358	GATGGTGGAGCTCAGGAGAG	GAGTGGAGCTCGAGGATGAG	225	MYB domain transcription factor;Homeodomain-like;SANT, DNA-binding
zma-miR164a/b/c/d/g&e	GRMZM2G146380	AGACGCTCGTCTTCTACACG	CGACGATGACCTCTTGCTG	230	No apical meristem (NAM) protein;Antifreeze protein, type I
zma-miR166a/b/c/d/g/h/I	AC187157.4_FG005	TTCATCCCCGAGTAGAGTGG	TAGGCAAGCTGCAGAAATCC	227	Basic-leucine zipper (bZIP) transcription factor;Homeodomain-like;Homeobox;Lipid-binding START;MEKHLA
zma-miR166a/b/c/d/g/h/I	GRMZM2G003509	CGATGAATCTTTTGCTGACG	CTCGAACGAGAACTGGAAGG	220	Basic-leucine zipper (bZIP) transcription factor;Methyltransferase small;Homeobox;Lipid-binding START;MEKHLA;Tapasin;Modification methylase HemK;N-6 adenine-specific DNA methylase, conserved site
zma-miR166a/b/c/d/g/h/I	GRMZM2G109987	TTCCTCCTTCCAGCTTGTGT	ATTGAAAGGCGATTGTCAGC	233	Basic-leucine zipper (bZIP) transcription factor;Homeodomain-like;Homeobox;Lipid-binding START;MEKHLA
zma-miR166a/b/c/d/g/h/I	GRMZM2G135175	CATCAACCTGCCTCTTACCC	CGCCCTTGAAGAGGATGTAA	173	Multi antimicrobial extrusion protein MatE
zma-miR166a/b/c/d/g/h/I	GRMZM2G178102	GACATCCTGGAGACGACGAT	CATGCTCGACCTGCACAC	300	Basic-leucine zipper (bZIP) transcription factor;Homeodomain-like;Homeobox;Lipid-binding START;MEKHLA
zma-miR166a/b/c/d/g/h/I	GRMZM2G469551	TGGTCCGTTATGTGTGGAGA	ACAAGGACTGCTGGTGGAAC	376	Basic-leucine zipper (bZIP) transcription factor;Homeodomain-like;Homeobox;Lipid-binding START;MEKHLA
zma-miR167a/b/c/d	GRMZM2G028980	CCATCTCCTTTTGCTCTTGG	TGCTTTGTAATGCTGCTGCT	247	Auxin response factor;Transcriptional factor B3
zma-miR167a/b/c/d	GRMZM2G035405	AATCGGCCACAAACTGTCAT	AAAGCATCCTGAATCGCATC	220	Auxin response factor;Transcriptional factor B3
zma-miR167a/b/c/d	GRMZM2G068328	GATCATGCCACACCAAGATG	GATCCAGAGCCGTTGTTCTC	186	unknown
zma-miR167a/b/c/d	GRMZM2G073750	AATTCGTCGAGCAAATCGTC	CTCAAAAAGCATCCGAAACC	238	Auxin response factor;Transcriptional factor B3;AUX/IAA protein
zma-miR167a/b/c/d	GRMZM2G078274	AAAACCAGCTTTTGCTTGGA	TGATATCCGCGTGTGAAAAA	227	Auxin response factor;Transcriptional factor B3
zma-miR167a/b/c/d	GRMZM2G081158	CAAGCGATAGCATGCACATT	CTCAAAAAGCATCCGAAACC	188	Auxin response factor;Transcriptional factor B3
zma-miR167a/b/c/d	GRMZM2G089640	CCCGTATATCTGTGGGGATG	ACGTTGGGAAAGTTGTCAGG	347	Auxin response factor
zma-miR168a/b	AC209206.3_FG011	CTTATGGGGACAGGTGCATT	CAGGCTCTTTCTTCCATCGT	203	Argonaute and Dicer protein
zma-miR168a/b	GRMZM2G039455	GTCCAGCAACAGTTTGAGCA	CTCCCATGACAGCACGATTA	250	Argonaute and Dicer protein, PAZ;Stem cell self-renewal protein Piwi;Region of unknown function DUF1785
zma-miR168a/b	GRMZM2G441583	GTGGTGTCAATCGTGCTGTC	AGCCAAATGGTGGAGATCAG	257	Argonaute and Dicer protein, PAZ;Stem cell self-renewal protein Piwi;Region of unknown function DUF1785
zma-miR169c/r	GRMZM2G000686	CCCATATGCCGATCCATACT	CTGCTTCGCGTTGACATAGA	157	CCAAT-binding transcription factor, subunit B;CCAAT-binding factor, conserved site
zma-miR169c/r	GRMZM5G857944	CGGGATACTTCGCAGAAGAC	AGTTGAGCCTGAGGAGCTTG	220	CCAAT-binding transcription factor, subunit B
zma-miR169c/r	GRMZM2G038303	TCCTTAGGAGGAGGCAGACA	TGTTGCCAATGGTCTTTGAG	216	CCAAT-binding transcription factor, subunit B;CCAAT-binding factor, conserved site
zma-miR169c/r	GRMZM2G040349	TCCTTAGGAGGAGGCAAACA	CACAATGAACCACTCGATGC	193	CCAAT-binding transcription factor, subunit B;CCAAT-binding factor, conserved site
zma-miR169c/r	GRMZM2G078124	GGAGATGAGCCTAGCATGGA	ATGGAAGCTCTGCTTCGGTA	151	Molluscan rhodopsin C-terminal tail
zma-miR169c/r	GRMZM5G849099	GCGACAAGACGAGTGTGAAG	ATGGAGCTGTAGAGGGAGCA	238	Homeodomain-like;MYB domain transcription factor;Streptococcal non-M secreted SibA;SANT, DNA-binding
zma-miR169c/r	GRMZM2G091964	ATCCGAGGAGCCTGTTTATG	GGGAGCACCACTGTCACTTT	208	CCAAT-binding transcription factor, subunit B;CCAAT-binding factor, conserved site
zma-miR171h/k	GRMZM2G055263	GACGTGTACTGCTGCTCCAA	GATGTGGGAGACCATCTGCT	225	GRAS transcription factor
zma-miR171h/k	GRMZM2G427337	GGACGATGAGAGGAGGGAAT	AAGTTATGTCGCCCTGGATG	231	Methyltransferase type 11;RAI1 like;MCP methyltransferase, CheR-type;VP6 blue-tongue virus inner capsid protein
zma-miR172b/c/d	GRMZM5G862109	TACAGGGGCGTCACCTTCTA	TCATCCTCGTAGTCGCTCAG	164	AP2-ERF Pathogenesis-related transcriptional factor and ERF, DNA-binding;DNA-binding, integrase-type;
zma-miR172b/c/d	GRMZM2G017847	GTAGCTTTGAAGCCGCAGAC	ATGAGCAGCCTCATTCATCC	153	Actin, conserved site;Actin/actin-like
zma-miR172b/c/d	GRMZM2G076602	CAAACTTCGATCCCAGCATT	TGGTCCGAGGACTTGTCG	175	AP2-ERF Pathogenesis-related transcriptional factor and ERF, DNA-binding;GPR6 orphan receptor;DNA-binding, integrase-type
zma-miR172b/c/d	GRMZM2G150893	GACGCCTACAACATCGTGAA	GCCTTCACTTTGTCCACCAC	224	Peroxidase
zma-miR172b/c/d	GRMZM2G160730	CAACTTCACCCTGGACGACT	GATCCTGGCCTCCCACTT	166	AP2-ERF Pathogenesis-related transcriptional factor and ERF, DNA-binding;DNA-binding, integrase-type;
zma-miR172b/c/d	GRMZM2G174784	CAAACTTCGATCCCAGCATT	GTCCGAGGTCTCGTCGTC	179	AP2-ERF Pathogenesis-related transcriptional factor and ERF, DNA-binding;Antifreeze protein, type I;DNA-binding, integrase-type;
zma-miR172b/c/d	GRMZM2G176175	CGTATGATAGGGCAGCCATT	TCATGCACGTTAGGTTGTGA	166	AP2-ERF Pathogenesis-related transcriptional factor and ERF, DNA-binding; istamine H3 receptor;DNA-binding, integrase-type
zma-miR172b/c/d	GRMZM2G383472	TACTTAGCGCTGTGGCTTCC	AAAATGATCCTGGCGTTGAG	240	unknown
zma-miR172b/c/d	GRMZM2G700665	TCAAATGCAATGGCAGAGAG	GCTTGCCTTGGTTTTCTTCA	200	AP2-ERF Pathogenesis-related transcriptional factor and ERF, DNA-binding;Na+/H+ exchanger, isoform 2 (NHE2);Antifreeze protein, type I;DNA-binding, integrase-type
zma-miR319a/b/c/d	GRMZM5G845366	CTCACAGTCGACACGGAAGA	GACAGACGAGAGGGACACCA	230	Zinc finger, CCCH-type;Ankyrin;Orphan nuclear receptor, NOR1 type
zma-miR159c/d&e&319a/b/c/d	GRMZM2G028054	GAACAAGTGGTCGAGGATGG	CCGTTCAAATCACCAGACAA	174	MYB domain transcription factor;Homeodomain-like;SANT, DNA-binding
zma-miR319a/b/c/d	GRMZM2G089361	CTCGGTTTCTCCATGTCCTC	CGGATGATGTGAGCTGGTT	187	TCP Transcription factor
zma-miR319a/b/c/d	GRMZM2G115516	CCTTCAGTCCAATTCGCAGT	AGTCCGTCCCAGAGCTGTAA	165	TCP Transcription factor
zma-miR159a/b/f/j/k&c/d&e&h/l&319a/b/c/d	GRMZM2G139688	GCCAAGATGGGGAACAAGT	CGCCACCGTTAAAATTACCA	190	MYB domain transcription factor;Homeodomain-like;SANT, DNA-binding
zma-miR319a/b/c/d	GRMZM2G180979	ATTGGGGCATAAATGGTGAA	GTGAGGGTCCAACGGAACTA	171	Zinc finger, CCCH-type;Ankyrin;Orphan nuclear receptor, NOR1 type
zma-miR319a/b/c/d	GRMZM2G388987	AAGTTTGCACCCATTTGCTC	TCTACAGCCTTCTCACCTCCA	165	Peptidase C19, ubiquitin carboxyl-terminal hydrolase 2;Zinc finger, MYND-type;Peptidase C19, ubiquitin carboxyl-terminal hydrolase 2, conserved site
zma-miR319a/b/c/d	GRMZM2G412073	CGATCAACCAGCAGTAGCAA	GTGGACTGAAGGACGCTCTC	160	unknown
zma-miR390a/b	AC234169.1_FG004	TGCTGGACTTCCTGTGGAG	CTCTCCACAAGCCTGGTGAC	175	Antifreeze_1
zma-miR390a/b	GRMZM2G080041	GGTACGACTTTCCCATCGTG	AGCTGAACACGTCCACCTTC	231	Leucine-rich repeat;Serine/threonine protein kinase-related;Leucine-rich repeat, N-terminal;Protein kinase-like;Leucine-rich repeat, typical subtype;Serine/threonine protein kinase;Tyrosine protein kinase;Serine/threonine protein kinase, active site
zma-miR390a/b	GRMZM2G084821	AAGTGTCCTCTCGGCATGAA	CGTCTCATCGATGGCACTAA	158	unknown
zma-miR390a/b	GRMZM2G155490	CTGGAGCTCAGGCATCTTGT	GGATTCCGTGAGGCAAAGTA	239	unknown
zma-miR390a/b	GRMZM2G304745	GCCACTTTGGCTTCTCATTC	CGGCTTATCTTTGGCACATT	210	Leucine-rich repeat;Protein kinase-like;Leucine-rich repeat, typical subtype;Serine/threonine protein kinase;Tyrosine protein kinase
zma-miR390a/b	GRMZM5G821637	GAAGACCGCTGTTGTTGTTG	TCTGCCATCTCCTTGATGCT	198	Heat shock chaperonin-binding;Pentatricopeptide repeat;Ankyrin
zma-miR393a/c	GRMZM2G135978	CTGTTGTGGCATCGTCTTGT	TGGTAATAAGGGCCTCGTTG	187	Cyclin-like F-box; Leucine-rich repeat;Leucine-rich repeat, cysteine-containing subtype
zma-miR396c/d	GRMZM2G045977	GCACCTTGTGCTCCCTATCT	GGCTTCCACAGGCTTTCTT	247	Glutamine-Leucine-Glutamine, QLQ;WRC
zma-miR396c/d	GRMZM2G105335	CCCATCCCTTCCTACCTCAT	TGCATGTGCTTCTCGCAGTA	239	Glutamine-Leucine-Glutamine, QLQ;WRC
zma-miR396c/d	GRMZM2G124566	CAGCCTGTGCTTCGACTACC	GGCTTCCACAGGCTTTCTT	166	Glutamine-Leucine-Glutamine, QLQ;WRC
zma-miR398a/b	GRMZM2G068519	CTTCCTTGCTGCTGTGTTCC	CGTCAGTGTCGTCAGACTCC	207	unknown
zma-miR408b	GRMZM2G004012	CACCTACTACGTCGGGGACA	ACCGGGTGCAGATGAAGA	242	Cupredoxin;Plastocyanin-like
zma-miR408b	GRMZM2G023847	AGTAGCGGCTGGAGTCGTAG	TGCCGCAGATGTAGTAGTGG	226	Cupredoxin;Plastocyanin-like;Myeloid transforming gene on chromosome 8 (MTG8)
zma-miR408b	GRMZM5G814718	CTTCTGCTCTGCTGCTTCCT	CAGTGGAGGGTCACGTTGTA	215	Multicopper oxidase, type 1;Cupredoxin;Multicopper oxidase, type 3
zma-miR408b	GRMZM2G097141	ATGGAGGGACTCACCACAAA	AGGGACCTGCGGTGTTTATT	217	unknown
zma-miR408b	GRMZM2G097851	GACTACGTGGTGGGCGACT	AGGACTGGATGGAGTTGCTG	181	Cupredoxin;Plastocyanin-like;Orphan nuclear receptor, NOR1 type;Blue (type 1) copper domain
zma-miR408b	GRMZM2G100121	AGCAAAGCATTCCCTGACAC	AGGTCGCCGAAGTAGGATCT	176	Leucine-rich repeat, ribonuclease inhibitor subtype
zma-miR408b	GRMZM5G866053	GTAGCTGTAGCCGTGCTCCT	GCCACGTGGTGTTGTACTTG	172	Cupredoxin;Plastocyanin-like;Blue (type 1) copper domain
zma-miR408b	GRMZM2G132169	AAGTACCGGTTCACCATCCA	GAGGATGACGGGGACTTCTC	159	Multicopper oxidase, type 1;Cupredoxin;Multicopper oxidase, copper-binding site;Multicopper oxidase, type 3;Laccase;Multicopper oxidase, type 2
zma-miR408b	GRMZM2G336337	GCTGCTGCTGCTCCTCTC	GTGTCGCCCTCTCTGACCT	177	Multicopper oxidase, type 1;Cupredoxin;Laccase;Multicopper oxidase, copper-binding site;Multicopper oxidase, type 3;Multicopper oxidase, type 2
zma-miR408b	GRMZM2G352678	GTCCAAGGGCAAGAGCTTC	ACCATCTTCATCCCCATCC	216	Cupredoxin;Plastocyanin-like
zma-miR408b	GRMZM2G384327	GCTAAGATTCAGGCGGACAA	AGCGGTATCCAAGCATCATC	223	D111/G-patch
zma-miR408b	GRMZM2G391794	CTTCACGGGCGTCAACTG	GGACATGTTCAGGCTGCTC	178	Leucine-rich repeat;Serine/threonine protein kinase-related;Leucine-rich repeat, N-terminal;Protein kinase-like;Leucine-rich repeat, typical subtype;Serine/threonine protein kinase;Protein kinase, ATP binding site;Tyrosine protein kinase;Serine/threonine protein kinase, active site
zma-miR408b	GRMZM2G441768	ACGTCTGCTCCTTGCTCTGT	TTCAGGGCGCTATGCTTTAT	243	Phosphopantetheine attachment site
zma-miR528a/b	GRMZM2G004106	TCCTCTGCGTGCTCCTTC	GTGCCTTGGGGTCGTACTT	153	Cupredoxin;Plastocyanin-like;Blue (type 1) copper domain
zma-miR528a/b	GRMZM2G039381	ACCAGCACCTGGACTAATGG	GGGATGCTGCAGATGAAGTAG	203	Cupredoxin;Plastocyanin-like;Blue (type 1) copper domain
zma-miR528a/b	GRMZM2G043300	TACCTGGACTAACGGCAAGC	GGGATGCTGCAGATGAAGTAG	198	Cupredoxin;Plastocyanin-like;Blue (type 1) copper domain
zma-miR528a/b	GRMZM2G062069	CTCCTCCGCCTGCCTCTT	ACCTCGATGGTGGTTGTGCT	150	unknown
zma-miR528a/b	GRMZM2G148937	CAGACCACCAGCCTCATGTA	ATCCGCCGTGAACAGCTC	207	Alkaline phosphatase;Multi antimicrobial extrusion protein MatE
zma-miR528a/b	GRMZM2G169033	AGGCTTCGGTAACTTCGACA	TGGCAATGCATAAACCACAC	150	Multicopper oxidase, type 1;Cupredoxin;Laccase;Multicopper oxidase, copper-binding site;Multicopper oxidase, type 3;Multicopper oxidase, type 2
zma-miR528a/b	GRMZM2G178741	ACGAACGAGGACGAGGTGT	CTTCTCCAGCTGCTTCGTCT	237	Homeodomain-like;Homeobox;Homeobox, conserved site;Leucine zipper, homeobox-associated;Helix-turn-helix motif, lambda-like repressor
zma-miR528a/b	GRMZM2G367668	CTTCTCCGCATGTCCCTTC	TTGTGAACCTTGACCACGAG	213	Multicopper oxidase, type 1;Cupredoxin;Laccase;Multicopper oxidase, copper-binding site;Multicopper oxidase, type 3;Multicopper oxidase, type 2
zma-miR156a/b/c/d/e/f/g/h/i/l&k&529	AC233751.1_FG002	CGAGTGCTCTGTGGACTTGA	GAACGGAAAAGCGTAACAGC	309	SBP-box transcription factor
zma-miR156a/b/c/d/e/f/g/h/i/l&k&529	GRMZM2G101511	AAGTGCCGCGACTACCAC	AGCTAGCAGAAGCCATGGTG	220	SBP-box transcription factor (tga1)
zma-miR156a/b/c/d/e/f/g/h/i/l&k&529	GRMZM2G126018	GCACAAGGTGTGCTACATGC	GTGAGGTGAGTGGTCCAGGT	191	SBP-box transcription factor
zma-miR156a/b/c/d/e/f/g/h/i/l&k&529	GRMZM2G160917	GGACTCCAGCTGTGCTCTCT	TCGAGCTCACCTGAGAACTG	288	SBP-box transcription factor
zma-miR156a/b/c/d/e/f/g/h/i/l&k&529	GRMZM2G307588	GGCTCAAGTTTGGCAAGAAG	CAGCTACGTTTCCCTTGGTC	328	SBP-box transcription factor
zma-miR529	GRMZM2G370777	AACTGGCAGAGGAGAACAGG	TGTGAACTCCCAGAATGCAA	151	Transcription factor, K-box
zma-miR156a/b/c/d/e/f/g/h/i/l&k&529	GRMZM2G460544	CCGACGCCAAGACCTACTAC	GCGACAGCTTTTCTTTTGCT	155	SBP-box transcription factor
zma-miR1432	GRMZM2G011469	TGGCTGGCTAGGATCTAGGA	CTCTTGGGATCCAGGTTCAA	235	Poly(ADP-ribose) polymerase, catalytic region
zma-miR1432	GRMZM2G423139	AGCGCTCCTCCATCTCCT	GCTCCATCATGTCCCTGAAC	306	EF hand;Parvalbumin;Calcium-binding EF-hand;EF-HAND 1
AGO1	GRMZM2G404121	TTACCTGCCCTCAAGGAAAA	ATTGCGAAACCACCAGAAAC	158	Argonaute and Dicer protein
AGO1	GRMZM2G045821	CTGTCGATAAAAGCGGGAAC	CAACCCATCAGCCGTAAAGT	170	Argonaute and Dicer protein
AGO1	GRMZM2G361518	TCTACTCGAGGAAGACGATGG	CCCGCAGAACAATATCAAGAA	170	Argonaute and Dicer protein
AGO1	GRMZM2G120019	GAGGGCAACTGGACAGAAAC	GCAAACAACCTGGTGTGATG	189	Argonaute and Dicer protein
AGO1	GRMZM2G162525	TTGGGGGAAGGAATACTGTG	AATTCTTGACGATGGGCTTG	214	Argonaute and Dicer protein
DCL1	GRMZM2G040762	TGTCATTCGCTTTGACCTTG	AGTGCCATCGAGATGACTGA	205	Argonaute and Dicer protein
zma-miRn6a	GRMZM2G033093	TTGGTTGACGAAATTCACGA	AACACCATTTTCTTGCAGTGG	245	Transcription factor, K-box
zma-miRn6a	GRMZM2G492156	AACCTGATTCGCCAAGAAAA	CTGTGGCAGTGTGCTGAGTT	165	Transcription factor, K-box
zma-miRn6a	GRMZM2G133563	TTCTCTAGCTCACCCGCATC	GCAGTTGCTGCCTCTAGCTT	150	Putative uncharacterized protein
zma-miRn6a	GRMZM2G052123	ACCTCATGCACCAGGAAAAC	ATTTGTCCCCTTGCACACTC	127	Transcription factor, K-box
zma-miRn7a	GRMZM2G096491	GTTCGTACCCAAGCGATGTT	GTTCCATGCCTTCAACCAAT	237	Mov34/MPN/PAD-1
zma-miRn7a	GRMZM2G092152	GCTCCTCTTCTCGCATCATC	CCTACGAGTTCGCTTTGGAG	224	Domain of unknown function DUF1794
zma-miRn7a	GRMZM2G088212	CCTGTGAATGCACCAAAATG	TTAGAACACGGGGAGGAATG	150	Catalase; Catalase-related immune responsive; Catalase related subgroup; Catalase-like domain, haem-dependent
zma-miRn7a	GRMZM2G011631	GGTACTGCGGAAAGGAAGTG	ACACTCAACGTGACCACCAA	162	DNA-directed DNA polymerase, family B, exonuclease domain; Polynucleotidyl transferase, ribonuclease H fold; DNA polymerase epsilon, catalytic subunit A, C-terminal
